# Supplementary material for: A Whole-Body Physiologically Based Pharmacokinetic Model Characterizing Interplay of OCTs and MATEs in Intestine, Liver and Kidney to Predict Drug-Drug Interactions of Metformin with Perpetrators
Source: MDPI journal article supplement (doi:10.3390/pharmaceutics13050698), 2021-05-11
Supplement: s1 [file s1]

# Supplementary Materials: A Whole-Body Physiologically Based Pharmacokinetic Model Characterizing Interplay of OCTs and MATEs in Intestine, Liver and Kidney to Predict Drug-Drug Interactions of Metformin with Perpetrators

Yiting Yang, Zexin Zhang, Ping Li, Weimin Kong, Xiaodong Liu and Li Liu

## 1. Physiological parameters for human used in the PBPK model.

**Table S1.** Physiological parameters for human used in the PBPK model.

| Tissue   | V (mL) [1,2] | Q (mL/min) [1] | Transit rate constant (min <sup>-1</sup> ) [3,4] | pH [5] |
|----------|--------------|----------------|--------------------------------------------------|--------|
| Lung     | 1170         | 5600           | /                                                |        |
| Kidneys  | 280          | 1240           | /                                                |        |
| Heart    | 310          | 240            | /                                                |        |
| Liver    | 1690         | 300            | /                                                |        |
| Muscle   | 35,000       | 750            | /                                                |        |
| Skin     | 7800         | 300            | /                                                |        |
| Brain    | 1450         | 700            | /                                                |        |
| Adipose  | 10,000       | 260            | /                                                |        |
| Rob      | 5100         | 592            | /                                                |        |
| Spleen   | 190          | 80             | /                                                |        |
| Artery   | 1730         | 5600           | /                                                |        |
| Venous   | 3470         | 5600           | /                                                |        |
| Stomach  | 160          | 38             | 0.0462                                           |        |
| Duodenum | 70           | 118            | 0.0462                                           | 5.67   |
| Jejunum  | 209          | 413            | 0.012                                            | 6.51   |
| Ileum    | 139          | 244            | 0.0058                                           | 7.42   |
| Cecum    | 116          | 44             | 0.004                                            | NA     |
| Colon    | 1116         | 281            | 0.0013                                           | 6.47   |

## 2. Ratios of concentration in tissue to plasma for building PBPK model.

**Table S2.** Ratios of concentration in tissue to plasma for metformin (Met), cimetidine (Cim), pyrimethamine (Pyr), trimethoprim (Tri), ondansetron (Ond), rabeprazole (Rab) and verapamil (Ver) [6].

| Tissue    | Met   | Cim  | Pyr  | Tri  | Ond   | Rab  | Ver   |
|-----------|-------|------|------|------|-------|------|-------|
| pKa       | 11.8  | 6.9  | 7.77 | 7.16 | 7.34  | 5    | 8.5   |
| LogP      | -1.43 | 0.48 | 2.62 | 1.28 | 2.56  | 2.3  | 3.79  |
| Adipose   | 0.18  | 1.89 | 6.8  | 3.8  | 39.02 | 0.08 | 12.95 |
| Liver     | 1.6   | 1.46 | 7.5  | 1.9  | 1.17  | 0.10 | 60.55 |
| Muscle    | 1.7   | 1.18 | 1.23 | 0.98 | 0.74  | 0.08 | 7.58  |
| Lung      | 1.46  | 2.35 | 2.4  | 2.04 | 1.48  | 0.22 | 14.24 |
| Kidney    | 1.49  | 1.58 | 6.8  | 1.9  | 1.12  | 0.14 | 54.70 |
| Brain     | 1.72  | 1.62 | 1.9  | 1.53 | 1.99  | 0.06 | 8.69  |
| Heart     | 1.47  | 1.42 | 2.7  | 1.34 | 1.06  | 0.17 | 19.27 |
| Intestine | 1.5   | 1.18 | 3.1  | 1.3  | 2.17  | 0.17 | 21.87 |
| Skin      | 1.11  | 2.31 | 2.1  | 1.94 | 3.12  | 0.29 | 12.49 |

|         |      |      |      |      |      |      |       |
|---------|------|------|------|------|------|------|-------|
| Spleen  | 1.66 | 2.02 | 3.6  | 1.89 | 0.73 | 0.11 | 25.06 |
| Stomach | 1.5  | 1.18 | 3.1  | 1.3  | 0.74 | 0.08 | 21.87 |
| Rest    | 1.2  | 0.01 | 0.01 | 1    | 0.01 | 0.01 | 0.01  |

### 3. The investigation of saturable metformin absorption

Table S3 and S4 are the observed and predicted pharmacokinetic parameters of metformin for different dosage, respectively. Simulation demonstrated that non-linear pharmacokinetics of metformin was attributed to transporter-mediated intestinal absorption.

**Table S3.** The observed pharmacokinetic parameters of metformin for different dosage.

| Dose (mg) | Ref. | C <sub>max</sub> (ug/mL) | AUC (h-ug/mL) | Dose/AUC |
|-----------|------|--------------------------|---------------|----------|
| 250       | [7]  | 0.59                     | 4.26          | 58.7     |
| 250       | [8]  | 0.78                     | 4.98          | 50.2     |
| 250       | [9]  | 0.74                     | 4.89          | 51.1     |
| 500       | [10] | 1.1                      | 5.8           | 86.2     |
| 500       | [11] | 1.55                     | 9.08          | 55.1     |
| 500       | [12] | 1.19                     | 6.58          | 76.0     |
| 500       | [13] | 1.21                     | 7.40          | 67.6     |
| 500       | [14] | 0.77                     | 5.96          | 83.9     |
| 500       | [15] | 1.3                      | 6.8           | 73.5     |
| 500       | [16] | 2.1                      | 16.9          | 29.6     |
| 500       | [17] | 1.14                     | 6.5           | 76.9     |
| 500       | [18] | 1.05                     | 6.3           | 79.4     |
| 500       | [19] | 2.0                      | 12.1          | 41.32    |
| 500       | [20] | 0.84                     | 6.3           | 79.4     |
| 500       | [21] | 0.99                     | 6.55          | 76.3     |
| 750       | [22] | 1.46                     | 6.52          | 115.0    |
| 750       | [23] | 1.51                     | 8.22          | 103.9    |
| 750       | [24] | 1.5                      | 9.4           | 79.8     |
| 750       | [25] | 4.2                      | 24.69         | 30.4     |
| 750       | [26] | 1.38                     | 9.17          | 81.8     |
| 850       | [27] | 1.3                      | 7.7           | 110.4    |
| 850       | [28] | 1.2                      | 7.2           | 118.1    |
| 850       | [29] | 1.81                     | 11.4          | 74.6     |
| 850       | [30] | 1.17                     | 6.69          | 127.1    |
| 850       | [31] | 2.28                     | 15.2          | 55.9     |
| 850       | [32] | 1.26                     | 14.2          | 59.9     |
| 1000      | [33] | 2.0                      | 13.2          | 75.8     |
| 1000      | [34] | 1.8                      | 11.1          | 90.1     |
| 1000      | [35] | 2.06                     | 12.41         | 80.58    |
| 1000      | [36] | 1.35                     | 10.3          | 97.1     |
| 1000      | [37] | 2.35                     | 12.81         | 78.1     |
| 1000      | [38] | 2.19                     | 14            | 71.4     |
| 1000      | [39] | 1.79                     | 12.57         | 79.5     |
| 1000      | [40] | 1.18                     | 7.95          | 125.8    |
| 1000      | [41] | 1.46                     | 10.6          | 94.3     |

**Table S4.** The predicted pharmacokinetic parameters of metformin for different dosage.

| Dose (mg) | C <sub>max</sub> (ug/mL) | AUC (h·ug/mL) | Dose/AUC |
|-----------|--------------------------|---------------|----------|
| 250       | 0.67                     | 4.80          | 52.06    |
| 500       | 0.95                     | 7.68          | 65.11    |
| 750       | 1.22                     | 10.19         | 73.61    |
| 850       | 1.32                     | 11.15         | 76.26    |
| 1000      | 1.47                     | 12.55         | 79.68    |

#### 4. Quantitatively predicted disposition kinetics for perpetrators

**Table S5.** The observed pharmacokinetic parameters of perpetrators in different references.

| Drug          | Ref. | Dose (mg) | C <sub>max</sub> (µg/mL) |        | AUC <sub>0-t</sub> (µg·h/mL) |        |
|---------------|------|-----------|--------------------------|--------|------------------------------|--------|
|               |      |           | Pre                      | Obs    | Pre                          | Obs    |
| Cimetidine    | [42] | 400       | 2.06                     | 2.20   | 9.17                         | 8.03   |
|               | [43] | 300       | 1.53                     | 1.53   | 6.68                         | 5.22   |
|               | [44] | 400       | 2.06                     | 1.5    | 8.90                         | 10.4   |
|               | [45] | 400       | 2.06                     | 1.93   | 8.61                         | 8.4    |
|               | [45] | 800       | 4.11                     | 3.7    | 17.28                        | 17.89  |
|               | [46] | 800       | 4.11                     | 2.47   | 16.76                        | 11.49  |
| Pyrimethamine | [47] | 50        | 0.5                      | 0.76   | 47.66                        | 76     |
|               | [48] | 75        | 0.86                     | 0.86   | 51.78                        | 124.6  |
|               | [49] | 75        | 0.86                     | 0.38   | 106.42                       | 79.42  |
| Trimethoprim  | [50] | 210       | 2.18                     | 2.35   | 28.26                        | 37.1   |
|               | [51] | 1400      | 13.76                    | 12.78  | 302.34                       | 299.31 |
| Ondansetron   | [52] | 8         | 0.046                    | 0.0272 | 0.203                        | 0.198  |
|               | [53] | 8         | 0.046                    | 0.037  | 0.233                        | 0.254  |
|               | [54] | 8         | 0.046                    | 0.033  | 0.253*                       | 0.287* |
| Rabeprazole   | [55] | 40        | 0.40                     | 0.502  | 1.26                         | 1.315  |
|               | [55] | 40        | 0.40                     | 0.444  | 1.26                         | 1.332  |
|               | [56] | 20        | 0.20                     | 0.252  | 0.62                         | 0.575  |
|               | [57] | 10        | 0.10                     | 0.15   | 0.29                         | 0.36   |
|               | [58] | 20        | 0.20                     | 0.47   | 0.62                         | 0.90   |
|               | [56] | 20        | 0.20                     | 0.25   | 0.62                         | 0.58   |
| Verapamil     | [59] | 40        | 0.050                    | 0.033  | 0.28                         | 0.22   |
|               | [60] | 80        | 0.099                    | 0.13   | 0.564                        | 0.387  |
|               | [61] | 80        | 0.099                    | 0.082  | 0.439                        | 0.17   |
|               | [62] | 160       | 0.20                     | 0.16   | 0.82                         | 0.80   |

\* AUC is calculated from 0 to ∞.

#### 5. The administration dosage for coadministration of metformin and perpetrators

The administration dosage of metformin and 6 perpetrators, cimetidine, pyrimethamine, trimethoprim, ondansetron, rabeprazole and verapamil were shown in Table S6.

**Table S6.** The administration schedule for metformin and perpetrators.

| Perpetrator | Ref. | administration schedule                                                                                                   |
|-------------|------|---------------------------------------------------------------------------------------------------------------------------|
| Cimetidine  | [7]  | The subjects received a single daily oral dose of 250 mg metformin in addition 400 mg cimetidine twice daily (2 × 200 mg) |
| Cimetidine  | [12] | The subjects received a single oral dose of 400 mg cimetidine and then a single oral dose of 500 mg metformin 2 h later   |

|                |      |                                                                                                                                                                                                                                                   |
|----------------|------|---------------------------------------------------------------------------------------------------------------------------------------------------------------------------------------------------------------------------------------------------|
| py-rimethamine | [63] | The subjects received 250 mg metformin 1 h after receiving 50 mg pyrimethamine                                                                                                                                                                    |
| py-rimethamine | [63] | The subjects received 0.1 mg metformin 1 h after receiving 50 mg pyrimethamine                                                                                                                                                                    |
| py-rimethamine | [14] | 500 mg metformin was administered with 50 mg pyrimethamine                                                                                                                                                                                        |
| trimethoprim   | [15] | Metformin 500 mg and trimethoprim 200 mg were administered orally at midnight and at 20:00 on the day before pharmacokinetic evaluation study. On study day, trimethoprim 200 mg was given half an hour before administration of 500 mg metformin |
| trimethoprim   | [30] | 850 mg metformin and 200 mg trimethoprim were administered orally in the evening (20:00) on the day before pharmacokinetic evaluation study and in the morning of study day (8:00)                                                                |
| ondansetron    | [31] | The subjects received 850 mg metformin 1 h after receiving 8 mg ondansetron                                                                                                                                                                       |
| rabeprazole    | [10] | The first dose of metformin (1000 mg) was taken orally on the day before study day at 20:00 PM, and the second dose (750 mg) metformin together with rabeprazole or placebo was given on study day at 8:00 AM with a 12 h interval                |
| rabeprazole    | [25] | At 8 PM the participants were given metformin (750 mg by mouth). The following day at 8 AM the subjects were given metformin 500 mg (by mouth) with rabeprazole                                                                                   |
| verapamil      | [23] | 750 mg metformin was administered with 180 mg verapamil                                                                                                                                                                                           |

## Reference

1. Davies, B.; Morris, T. Physiological parameters in laboratory animals and humans. *Pharm Res* **1993**, *10*, 1093–1095, doi:10.1023/a:1018943613122.
2. DeSesso, J.M.; Jacobson, C.F. Anatomical and physiological parameters affecting gastrointestinal absorption in humans and rats. *Food Chem Toxicol* **2001**, *39*, 209–228, doi:10.1016/s0278-6915(00)00136-8.
3. Perdaems, N.; Blasco, H.; Vinson, C.; Chenel, M.; Whalley, S.; Cazade, F.; Bouzom, F. Predictions of metabolic drug-drug interactions using physiologically based modelling: Two cytochrome P450 3A4 substrates coadministered with ketoconazole or verapamil. *Clin Pharmacokinet* **2010**, *49*, 239–258, doi:10.2165/11318130-000000000-00000.
4. Heikkinen, A.T.; Baneyx, G.; Caruso, A.; Parrott, N. Application of PBPK modeling to predict human intestinal metabolism of CYP3A substrates - an evaluation and case study using GastroPlus. *Eur J Pharm Sci* **2012**, *47*, 375–386, doi:10.1016/j.ejps.2012.06.013.
5. Abuhelwa, A.Y.; Foster, D.J.R.; Upton, R.N. A Quantitative Review and Meta-Models of the Variability and Factors Affecting Oral Drug Absorption-Part I: Gastrointestinal pH. *AAPS J* **2016**, *18*, 1309–1321, doi:10.1208/s12248-016-9952-8.
6. Rodgers, T.; Rowland, M. Physiologically based pharmacokinetic modelling 2: predicting the tissue distribution of acids, very weak bases, neutrals and zwitterions. *J Pharm Sci* **2006**, *95*, 1238–1257, doi:10.1002/jps.20502.
7. Somogyi, A.; Stockley, C.; Keal, J.; Rolan, P.; Bochner, F. Reduction of metformin renal tubular secretion by cimetidine in man. *Br J Clin Pharmacol* **1987**, *23*, 545–551, doi:10.1111/j.1365-2125.1987.tb03090.x.
8. Rong, G.; Zhong, M.Y.; Xia, Z.H.; Yuan, W.Z.; Hong, Z.W.; Long, Y.H. Bioequivalence of metformin hydrochloride tablets in healthy Chinese subjects. *Chin J Clin Pharmacol* **2021**, *37*, 222–226.
9. CHEN Li; ZHANG Xin; LU Xing; XIAO Chun yan; QIAO Ke; CHEN Xiao wu; tong, L.J. Bioequivalence of metformin hydrochloride in Chinese healthy subjects. *Chin J Clin Pharmacol* **2019**, *35*, 854–857, doi:10.13699/j.cnki.1001-6821.2019.09.009.

10. Kim, A.; Chung, I.; Yoon, S.H.; Yu, K.S.; Lim, K.S.; Cho, J.Y.; Lee, H.; Jang, I.J.; Chung, J.Y. Effects of proton pump inhibitors on metformin pharmacokinetics and pharmacodynamics. *Drug Metab Dispos* **2014**, *42*, 1174–1179, doi:10.1124/dmd.113.055616.
11. Pentikainen, P.J.; Neuvonen, P.J.; Penttilä, A. Pharmacokinetics of metformin after intravenous and oral administration to man. *Eur J Clin Pharmacol* **1979**, *16*, 195–202, doi:10.1007/BF00562061.
12. Wang, Z.J.; Yin, O.Q.; Tomlinson, B.; Chow, M.S. OCT2 polymorphisms and in-vivo renal functional consequence: studies with metformin and cimetidine. *Pharmacogenet Genomics* **2008**, *18*, 637–645, doi:10.1097/FPC.0b013e328302cd41.
13. Garza-Ocanas, L.; Gonzalez-Canudas, J.; Tamez-de la, O.E.; Badillo-Castaneda, C.; Gomez-Meza, M.V.; Romero-Antonio, Y.; Molina-Perez, A.; Amador-Hernandez, A.G. Comparative Bioavailability of Metformin Hydrochloride Oral Solution Versus Metformin Hydrochloride Tablets in Fasting Mexican Healthy Volunteers. *Adv Ther* **2019**, *36*, 407–415, doi:10.1007/s12325-018-0853-3.
14. Oh, J.; Chung, H.; Park, S.I.; Yi, S.J.; Jang, K.; Kim, A.H.; Yoon, J.; Cho, J.Y.; Yoon, S.H.; Jang, I.J., et al. Inhibition of the multidrug and toxin extrusion (MATE) transporter by pyrimethamine increases the plasma concentration of metformin but does not increase antihyperglycaemic activity in humans. *Diabetes Obes Metab* **2016**, *18*, 104–108, doi:10.1111/dom.12577.
15. Grun, B.; Kiessling, M.K.; Burhenne, J.; Riedel, K.D.; Weiss, J.; Rauch, G.; Haefeli, W.E.; Czock, D. Trimethoprim-metformin interaction and its genetic modulation by OCT2 and MATE1 transporters. *Br J Clin Pharmacol* **2013**, *76*, 787–796, doi:10.1111/bcp.12079.
16. McCreight, L.J.; Stage, T.B.; Connelly, P.; Lonergan, M.; Nielsen, F.; Prehn, C.; Adamski, J.; Brosen, K.; Pearson, E.R. Pharmacokinetics of metformin in patients with gastrointestinal intolerance. *Diabetes Obes Metab* **2018**, *20*, 1593–1601, doi:10.1111/dom.13264.
17. Jang, K.; Chung, H.; Yoon, J.S.; Moon, S.J.; Yoon, S.H.; Yu, K.S.; Kim, K.; Chung, J.Y. Pharmacokinetics, Safety, and Tolerability of Metformin in Healthy Elderly Subjects. *J Clin Pharmacol* **2016**, *56*, 1104–1110, doi:10.1002/jcph.699.
18. Groen-Wijnberg, M.; van Dijk, J.; Krauwinkel, W.; Kerbusch, V.; Meijer, J.; Tretter, R.; Zhang, W.; van Gelderen, M. Pharmacokinetic Interactions Between Mirabegron and Metformin, Warfarin, Digoxin or Combined Oral Contraceptives. *Eur J Drug Metab Pharmacokinet* **2017**, *42*, 417–429, doi:10.1007/s13318-016-0350-5.
19. Te Brake, L.H.M.; Yunivita, V.; Livia, R.; Soetedjo, N.; van Ewijk-Beneken Kolmer, E.; Koenderink, J.B.; Burger, D.M.; Santoso, P.; van Crevel, R.; Alisjahbana, B., et al. Rifampicin Alters Metformin Plasma Exposure but Not Blood Glucose Levels in Diabetic Tuberculosis Patients. *Clin Pharmacol Ther* **2019**, *105*, 730–737, doi:10.1002/cpt.1232.
20. Zaharenko, L.; Kalnina, I.; Geldnere, K.; Konrade, I.; Grinberga, S.; Zidzik, J.; Javorsky, M.; Lejnieks, A.; Nikitina-Zake, L.; Fridmanis, D., et al. Single nucleotide polymorphisms in the intergenic region between metformin transporter OCT2 and OCT3 coding genes are associated with short-term response to metformin monotherapy in type 2 diabetes mellitus patients. *Eur J Endocrinol* **2016**, *175*, 531–540, doi:10.1530/Eje-16-0347.
21. Kim, S.; Jang, I.J.; Shin, D.; Shin, D.S.; Yoon, S.; Lim, K.S.; Yu, K.S.; Li, J.; Zhang, H.; Liu, Y., et al. Investigation of bioequivalence of a new fixed-dose combination of acarbose and metformin with the corresponding loose combination as well as the drug-drug interaction potential between both drugs in healthy adult male subjects. *J Clin Pharm Ther* **2014**, *39*, 424–431, doi:10.1111/jcpt.12166.
22. Wen, J.; Zeng, M.; Liu, Z.; Zhou, H.; Xu, H.; Huang, M.; Zhang, W. The influence of telmisartan on metformin pharmacokinetics and pharmacodynamics. *J Pharmacol Sci* **2019**, *139*, 37–41, doi:10.1016/j.jphs.2018.11.007.
23. Cho, S.K.; Kim, C.O.; Park, E.S.; Chung, J.Y. Verapamil decreases the glucose-lowering effect of metformin in healthy volunteers. *Br J Clin Pharmacol* **2014**, *78*, 1426–1432, doi:10.1111/bcp.12476.

- 
24. Cho, S.K.; Yoon, J.S.; Lee, M.G.; Lee, D.H.; Lim, L.A.; Park, K.; Park, M.S.; Chung, J.Y. Rifampin enhances the glucose-lowering effect of metformin and increases OCT1 mRNA levels in healthy participants. *Clin Pharmacol Ther* **2011**, *89*, 416–421, doi:10.1038/clpt.2010.266.
25. Liu, G.; Wen, J.; Guo, D.; Wang, Z.; Hu, X.; Tang, J.; Liu, Z.; Zhou, H.; Zhang, W. The effects of rabeprazole on metformin pharmacokinetics and pharmacodynamics in Chinese healthy volunteers. *J Pharmacol Sci* **2016**, *132*, 244–248, doi:10.1016/j.jphs.2016.04.016.
26. Shibata, M.; Toyoshima, J.; Kaneko, Y.; Oda, K.; Nishimura, T. A drug-drug interaction study to evaluate the impact of peficitinib on OCT1-and MATE1-mediated transport of metformin in healthy volunteers. *European Journal of Clinical Pharmacology* **2020**, *76*, 1135–1141, doi:10.1007/s00228-020-02876-2.
27. Shu, Y.; Brown, C.; Castro, R.A.; Shi, R.J.; Lin, E.T.; Owen, R.P.; Sheardown, S.A.; Yue, L.; Burchard, E.G.; Brett, C.M., et al. Effect of genetic variation in the organic cation transporter 1, OCT1, on metformin pharmacokinetics. *Clin Pharmacol Ther* **2008**, *83*, 273–280, doi:10.1038/sj.clpt.6100275.
28. Rocha, J.F.; Vaz-da-Silva, M.; Almeida, L.; Falcao, A.; Nunes, T.; Santos, A.T.; Martins, F.; Fontes-Ribeiro, C.; Macedo, T.; Soares-da-Silva, P. Effect of eslicarbazepine acetate on the pharmacokinetics of metformin in healthy subjects. *Int J Clin Pharmacol Ther* **2009**, *47*, 255–261, doi:10.5414/cpp47255.
29. Morrissey, K.M.; Stocker, S.L.; Chen, E.C.; Castro, R.A.; Brett, C.M.; Giacomini, K.M. The Effect of Nizatidine, a MATE2K Selective Inhibitor, on the Pharmacokinetics and Pharmacodynamics of Metformin in Healthy Volunteers. *Clin Pharmacokinet* **2016**, *55*, 495–506, doi:10.1007/s40262-015-0332-9.
30. Muller, F.; Pontones, C.A.; Renner, B.; Mieth, M.; Hoier, E.; Auge, D.; Maas, R.; Zolk, O.; Fromm, M.F. N(1)-methylnicotinamide as an endogenous probe for drug interactions by renal cation transporters: studies on the metformin-trimethoprim interaction. *Eur J Clin Pharmacol* **2015**, *71*, 85–94, doi:10.1007/s00228-014-1770-2.
31. Li, Q.; Yang, H.; Guo, D.; Zhang, T.; Polli, J.E.; Zhou, H.; Shu, Y. Effect of Ondansetron on Metformin Pharmacokinetics and Response in Healthy Subjects. *Drug Metab Dispos* **2016**, *44*, 489–494, doi:10.1124/dmd.115.067223.
32. Hibma, J.E.; Zur, A.A.; Castro, R.A.; Wittwer, M.B.; Keizer, R.J.; Yee, S.W.; Goswami, S.; Stocker, S.L.; Zhang, X.; Huang, Y., et al. The Effect of Famotidine, a MATE1-Selective Inhibitor, on the Pharmacokinetics and Pharmacodynamics of Metformin. *Clin Pharmacokinet* **2016**, *55*, 711–721, doi:10.1007/s40262-015-0346-3.
33. Dawra, V.K.; Cutler, D.L.; Zhou, S.; Krishna, R.; Shi, H.; Liang, Y.; Alvey, C.; Hickman, A.; Saur, D.; Terra, S.G., et al. Assessment of the Drug Interaction Potential of Ertugliflozin With Sitagliptin, Metformin, Glimepiride, or Simvastatin in Healthy Subjects. *Clin Pharmacol Drug Dev* **2019**, *8*, 314–325, doi:10.1002/cpdd.472.
34. Padwal, R.S.; Gabr, R.Q.; Sharma, A.M.; Langkaas, L.A.; Birch, D.W.; Karmali, S.; Brocks, D.R. Effect of gastric bypass surgery on the absorption and bioavailability of metformin. *Diabetes Care* **2011**, *34*, 1295–1300, doi:10.2337/dc10-2140.
35. Smolders, E.J.; Colbers, A.; de Kanter, C.; Velthoven-Graafland, K.; Wolberink, L.T.; van Ewijk-Beneken Kolmer, N.; Drenth, J.P.H.; Aarnoutse, R.E.; Tack, C.J.; Burger, D.M. Metformin and daclatasvir: absence of a pharmacokinetic-pharmacodynamic drug interaction in healthy volunteers. *Br J Clin Pharmacol* **2017**, *83*, 2225–2234, doi:10.1111/bcp.13323.
36. Sanchez, R.I.; Yee, K.L.; Fan, L.; Cislak, D.; Martell, M.; Jordan, H.R.; Iwamoto, M.; Khalilieh, S. Evaluation of the Pharmacokinetics of Metformin Following Coadministration With Doravirine in Healthy Volunteers. *Clin Pharmacol Drug Dev* **2020**, *9*, 107–114, doi:10.1002/cpdd.685.
37. Conde-Carmona, I.; Garcia-Medina, S.; Jimenez-Vargas, J.M.; Martinez-Munoz, A.; Lee, S.H. Pharmacokinetic Interactions Between Gemigliptin and Metformin, and Potential Differences in the Pharmacokinetic Profile of Gemigliptin Between the Mexican and Korean Populations: A Randomized, Open-label Study in Healthy Mexican Volunteers. *Clinical Therapeutics* **2018**, *40*, 1729–1740, doi:10.1016/j.clinthera.2018.08.015.

- 
38. Christensen, M.M.H.; Hojlund, K.; Hother-Nielsen, O.; Stage, T.B.; Damkier, P.; Beck-Nielsen, H.; Broesen, K. Steady-state pharmacokinetics of metformin is independent of the OCT1 genotype in healthy volunteers. *European Journal of Clinical Pharmacology* **2015**, *71*, 691–697, doi:10.1007/s00228-015-1853-8.
39. Yi, L.; Zhang, H.; Zhang, J.W.; You, X.M.; Ning, Z.Q.; Yu, J.; Qian, L.F.; Miao, L.Y. Study on Drug-Drug Interactions Between Chiglitazar, a Novel PPAR Pan-Agonist, and Metformin Hydrochloride in Healthy Subjects. *Clin Pharm Drug Dev* **2019**, *8*, 934–941, doi:10.1002/cpdd.668.
40. Lesko, L.J.; Offman, E.; Brew, C.T.; Garza, D.; Benton, W.; Mayo, M.R.; Romero, A.; Du Mond, C.; Weir, M.R. Evaluation of the Potential for Drug Interactions With Patiromer in Healthy Volunteers. *J Cardiovasc Pharm T* **2017**, *22*, 434–446, doi:10.1177/1074248417691135.
41. Kuhlmann, I.; Pedersen, S.A.; Esbech, P.S.; Stage, T.B.; Christensen, M.M.H.; Broesen, K. Using a limited sampling strategy to investigate the interindividual pharmacokinetic variability in metformin: A large prospective trial. *Brit J Clin Pharmacol* **2020**, 10.1111/bcp.14591, doi:10.1111/bcp.14591.
42. Jantravid, E.; Prakongpan, S.; Amidon, G.L.; Dressman, J.B. Feasibility of biowaiver extension to biopharmaceutics classification system class III drug products: cimetidine. *Clin Pharmacokinet* **2006**, *45*, 385–399, doi:10.2165/00003088-200645040-00004.
43. Walkenstein, S.S.; Dubb, J.W.; Randolph, W.C.; Westlake, W.J.; Stote, R.M.; Intoccia, A.P. Bioavailability of cimetidine in man. *Gastroenterology* **1978**, *74*, 360–365.
44. Grahn, A.; von Bahr, C.; Lindstrom, B.; Rosen, A. Bioavailability and pharmacokinetics of cimetidine. *Eur J Clin Pharmacol* **1979**, *16*, 335–340, doi:10.1007/BF00605632.
45. Bodemar, G.; Norlander, B.; Walan, A. Pharmacokinetics of cimetidine after single doses and during continuous treatment. *Clin Pharmacokinet* **1981**, *6*, 306–315, doi:10.2165/00003088-198106040-00005.
46. Klein-Schwartz, W.; Doyon, S.; Dowling, T. Drug adsorption efficacy and palatability of a novel charcoal cookie formulation. *Pharmacotherapy* **2010**, *30*, 888–894, doi:10.1592/phco.30.9.888.
47. Mansor, S.M.; Navaratnam, V.; Mohamad, M.; Hussein, S.; Kumar, A.; Jamaludin, A.; Wernsdorfer, W.H. Single dose kinetic study of the triple combination mefloquine/sulphadoxine/pyrimethamine (Fansimef) in healthy male volunteers. *Br J Clin Pharmacol* **1989**, *27*, 381–386, doi:10.1111/j.1365-2125.1989.tb05381.x.
48. Minzi, O.M.; Gupta, A.; Haule, A.F.; Kagashe, G.A.; Massele, A.Y.; Gustafsson, L.L. Lack of impact of artesunate on the disposition kinetics of sulfadoxine/pyrimethamine when the two drugs are concomitantly administered. *Eur J Clin Pharmacol* **2007**, *63*, 457–462, doi:10.1007/s00228-007-0278-4.
49. Nyunt, M.M.; Adam, I.; Kayentao, K.; van Dijk, J.; Thuma, P.; Mauff, K.; Little, F.; Cassam, Y.; Guirou, E.; Traore, B., et al. Pharmacokinetics of sulfadoxine and pyrimethamine in intermittent preventive treatment of malaria in pregnancy. *Clin Pharmacol Ther* **2010**, *87*, 226–234, doi:10.1038/clpt.2009.177.
50. Hoppu, K.; Tuomisto, J.; Koskimies, O.; Simell, O. Food and guar decrease absorption of trimethoprim. *Eur J Clin Pharmacol* **1987**, *32*, 427–429, doi:10.1007/BF00543981.
51. Hruska, M.W.; Frye, R.F. Determination of trimethoprim in low-volume human plasma by liquid chromatography. *J Chromatogr B Analyt Technol Biomed Life Sci* **2004**, *807*, 301–305, doi:10.1016/j.jchromb.2004.04.021.
52. Villikka, K.; Kivisto, K.T.; Neuvonen, P.J. The effect of rifampin on the pharmacokinetics of oral and intravenous ondansetron. *Clin Pharmacol Ther* **1999**, *65*, 377–381, doi:10.1016/S0009-9236(99)70130-X.
53. Zhu, Y.; Zhang, Q.; Zou, J.; Wan, M.; Zhao, Z.; Zhu, J. Pharmacokinetics and bioavailability study of two ondansetron oral soluble film formulations in fasting healthy male Chinese volunteers. *Drug Des Devel Ther* **2015**, *9*, 4621–4629, doi:10.2147/DDDT.S86415.

- 
54. Dychter, S.S.; Harrigan, R.; Bahn, J.D.; Printz, M.A.; Sugarman, B.J.; DeNoia, E.; Haughey, D.B.; Fellows, D.; Maneval, D.C. Tolerability and pharmacokinetic properties of ondansetron administered subcutaneously with recombinant human hyaluronidase in minipigs and healthy volunteers. *Clin Ther* **2014**, *36*, 211–224, doi:10.1016/j.clinthera.2013.12.013.
55. Chen, J.; Jiang, W.M.; Gao, X.L.; Jiang, X.; Zhang, Q.Z.; Zheng, Z.H. Bioequivalence evaluation of two rabeprazole enteric coated formulations in healthy Chinese volunteers. *Eur J Drug Metab Pharmacokinet* **2004**, *29*, 103–106, doi:10.1007/BF03190583.
56. Noubarani, M.; Keyhanfar, F.; Motevalian, M.; Mahmoudian, M. Improved HPLC method for determination of four PPIs, omeprazole, pantoprazole, lansoprazole and rabeprazole in human plasma. *J Pharm Pharm Sci* **2010**, *13*, 1–10, doi:10.18433/j3gp4q.
57. Thyssen, A.; Solanki, B.; Treem, W. Randomized, open-label, single-dose, crossover, relative bioavailability study in healthy adults, comparing the pharmacokinetics of rabeprazole granules administered using soft food or infant formula as dosing vehicle versus suspension. *Clin Ther* **2012**, *34*, 1636–1645, doi:10.1016/j.clinthera.2012.06.008.
58. Arai, K.; Takeuchi, Y.; Watanabe, H.; Tsukurimichi, A.; Uchida, N.; Imawari, M. Prokinetics influence the pharmacokinetics of rabeprazole. *Digestion* **2008**, *78*, 67–71, doi:10.1159/000165351.
59. Sawicki, W. Pharmacokinetics of verapamil and norverapamil from controlled release floating pellets in humans. *Eur J Pharm Biopharm* **2002**, *53*, 29–35, doi:10.1016/s0939-6411(01)00189-8.
60. Dadashzadeh, S.; Javadian, B.; Sadeghian, S. The effect of gender on the pharmacokinetics of verapamil and norverapamil in human. *Biopharm Drug Dispos* **2006**, *27*, 329–334, doi:10.1002/bdd.512.
61. Hamann, S.R.; Blouin, R.A.; McAllister, R.G., Jr. Clinical pharmacokinetics of verapamil. *Clin Pharmacokinet* **1984**, *9*, 26–41, doi:10.2165/00003088-198409010-00002.
62. Meredith, P.A.; Elliott, H.L.; Pasanisi, F.; Kelman, A.W.; Sumner, D.J.; Reid, J.L. Verapamil pharmacokinetics and apparent hepatic and renal blood flow. *Br J Clin Pharmacol* **1985**, *20*, 101–106, doi:10.1111/j.1365-2125.1985.tb05038.x.
63. Kusuhara, H.; Ito, S.; Kumagai, Y.; Jiang, M.; Shiroshita, T.; Moriyama, Y.; Inoue, K.; Yuasa, H.; Sugiyama, Y. Effects of a MATE protein inhibitor, pyrimethamine, on the renal elimination of metformin at oral microdose and at therapeutic dose in healthy subjects. *Clin Pharmacol Ther* **2011**, *89*, 837–844, doi:10.1038/clpt.2011.36.
